# Supplementary material for: Les moyens d'information entre la liberté d'expression et le régime répressif : étude comparée du droit français et du droit marocain
Source: PLOS journal article supplement (doi:10.1371/journal.pone.0253118), 2003-01-01
Supplement: S4 (10.1371/journal.pone.0253118.s004) [file journal.pone.0253118.s004]

**Supplementary Table 4** Prevalence of underlying risk conditions, number of individuals per risk group status and total number CAP cases per risk group status according to the base case definition of CAP.

| Risk Group Status            | Prevalence | N         | Pneumonia Cases |              |            |
|------------------------------|------------|-----------|-----------------|--------------|------------|
|                              |            |           | All             | Hospitalized | Outpatient |
| 16 – 59 years                |            |           |                 |              |            |
| Low-Risk conditions overall  | 74.2%      | 1,583,937 | 6,108           | 872          | 5,321      |
| At-Risk conditions overall   | 19.6%      | 417,438   | 3,906           | 631          | 3,352      |
| Chronic heart disease        | 3.5%       | 74,295    | 724             | 138          | 604        |
| Chronic pulmonary disease    | 13.8%      | 295,378   | 3,020           | 434          | 2637       |
| Diabetes mellitus            | 3.2%       | 67,908    | 657             | 133          | 541        |
| Neurological disorders       | 1.4%       | 29,080    | 377             | 151          | 247        |
| High-Risk conditions overall | 6.2%       | 133,052   | 1,729           | 546          | 1245       |
| ≥ 60 years                   |            |           |                 |              |            |
| Low-Risk conditions overall  | 36.5%      | 392,729   | 3,078           | 1,223        | 1,931      |
| At-Risk conditions overall   | 36.9%      | 396,923   | 8,535           | 4,217        | 4,676      |
| Chronic heart disease        | 18.5%      | 199,210   | 4,904           | 2,530        | 2,591      |
| Chronic pulmonary disease    | 14.4%      | 155,266   | 4,533           | 2,047        | 2690       |
| Diabetes mellitus            | 16.4%      | 176,609   | 3,591           | 1,851        | 1898       |
| Neurological disorders       | 2.6%       | 279,63    | 1,287           | 830          | 536        |
| High-Risk conditions overall | 26.6%      | 286,194   | 9,778           | 5,729        | 4458       |
| ≥ 18 years                   |            |           |                 |              |            |
| Low-Risk conditions overall  | 61.1%      | 1,916,280 | 8,974           | 2,065        | 7,064      |
| At-Risk conditions overall   | 25.6%      | 803,232   | 12,347          | 4,832        | 7,950      |
| Chronic heart disease        | 8.7%       | 272,608   | 5,617           | 2,664        | 3,188      |
| Chronic pulmonary disease    | 14.1%      | 441,318   | 7,477           | 2,468        | 5264       |
| Diabetes mellitus            | 7.8%       | 244,147   | 4,245           | 1,983        | 2437       |
| Neurological disorders       | 1.8%       | 56,108    | 1,647           | 975          | 772        |
| High-Risk conditions overall | 13.3%      | 417,716   | 11,483          | 6,266        | 5688       |
